# Supplementary material for: Allogeneic Non-Adherent Bone Marrow Cells Facilitate Hematopoietic Recovery but Do Not Lead to Allogeneic Engraftment
Source: PubMed Central journal article supplement (PMC2701999; doi:10.1371/journal.pone.0006157), 2009-07-07

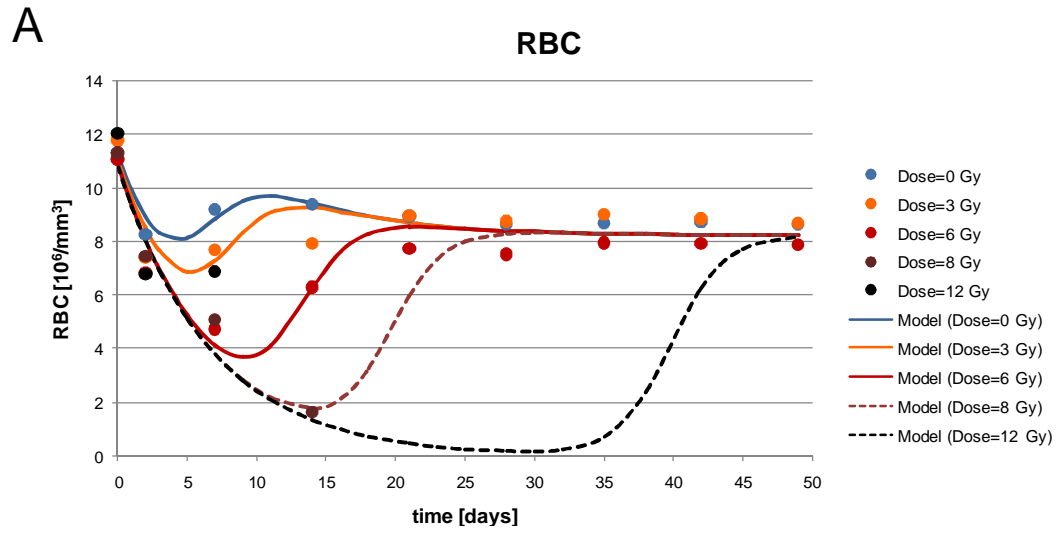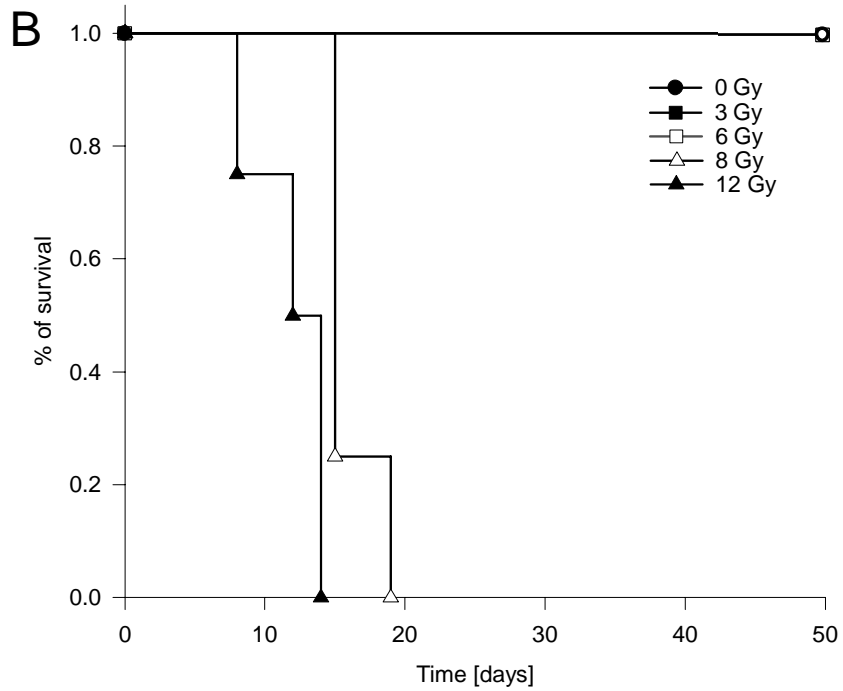

Supplement: pone.0006157.s001.pdf [file pone.0006157.s001.pdf]
